# Supplementary material for: Dietary fiber supplementation increases Drosophila melanogaster lifespan and gut microbiota diversity
Source: Royal Society of Chemistry journal article supplement (doi:10.1039/d4fo00879k), 2024-01-01

Supplementary Figure 3. Relative abundances (Log) of Phylum of beneficial or pathogenic microbes.

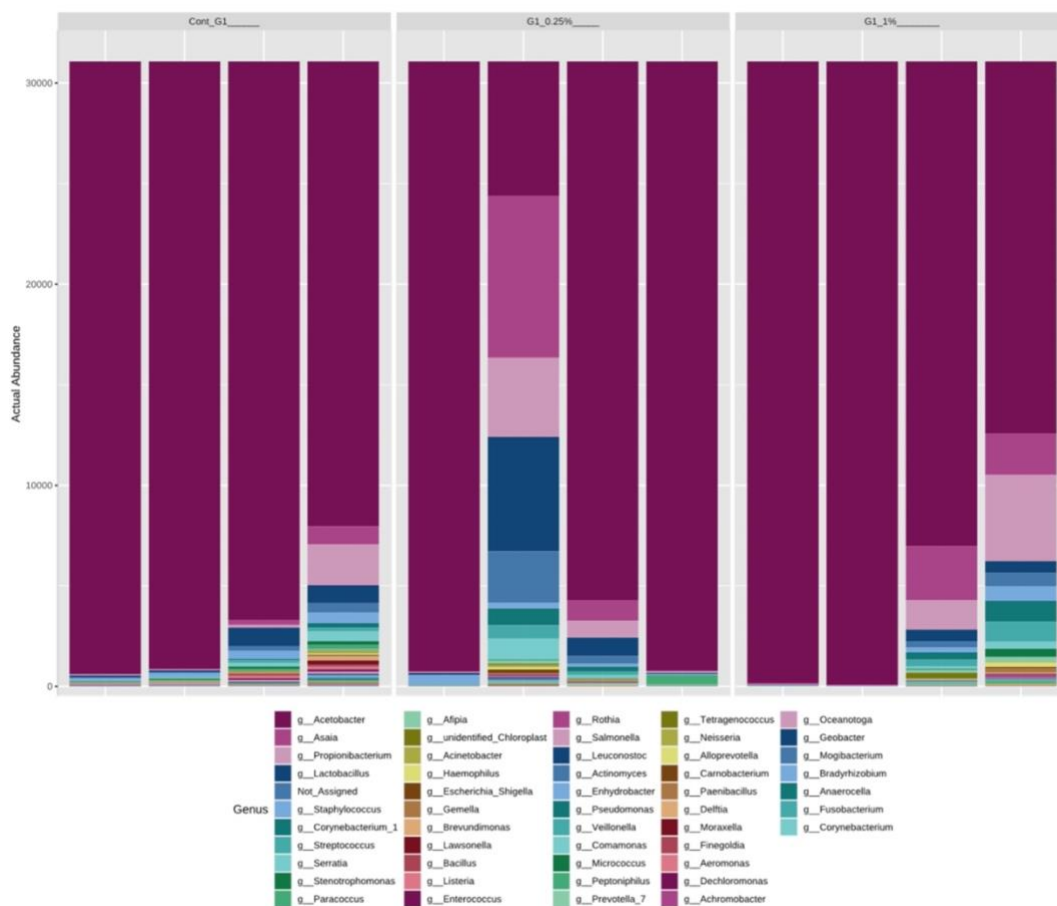

Supplement: d4fo00879k3.pdf [file d4fo00879k3.pdf]
