# Supplementary material for: Dietary fiber supplementation increases Drosophila melanogaster lifespan and gut microbiota diversity
Source: Royal Society of Chemistry journal article supplement (doi:10.1039/d4fo00879k), 2024-01-01
Supplement: d4fo00879k7.pdf [file d4fo00879k7.pdf]

**Supplementary Table 3** List of p-values obtained for each main effect and their interaction in the Two-way ANOVA analysis of the results of RT-PCR assay.

|                     | <i>Duox</i> | <i>AttA</i> | <i>DptA</i> |
|---------------------|-------------|-------------|-------------|
|                     | p<          |             |             |
| age                 | 0.05        | 0.0001      | 0.1907      |
| supplementation     | 0.1042      | 0.0066      | 0.1746      |
| age*supplementation | 0.0001      | 0.0004      | 0.1590      |
